# Supplementary material
Source: ML conference proceedings conference paper supplement (https://openreview.net/forum?id=IU3nj1tqwyY)
Supplement: supplementary_material [file attachment]

## 2 Appendix

### 3 A Materials and Methods

#### 4 A.1 Natural Scenes Dataset

5 Here, we briefly summarize the data acquisition and preprocessing steps that are described in detail  
6 elsewhere [1]. Scanning was conducted at 7T using whole-brain gradient-echo EPI at 1.8-mm  
7 resolution and 1.6-s repetition time. Images were taken from the Microsoft Common Objects in  
8 Context (COCO) database [2], square cropped, and presented at a size of 8.4° x 8.4°. A special  
9 set of 1,000 images were shared across subjects; the remaining images were mutually exclusive  
10 across subjects. Images were presented for 3 s with 1-s gaps in between images. Subjects fixated  
11 centrally and performed a long-term continuous recognition task on the images. The fMRI data were  
12 pre-processed by performing one temporal interpolation (to correct for slice time differences) and one  
13 spatial interpolation (to correct for head motion). A general linear model was then used to estimate  
14 single-trial beta weights. Cortical surface reconstructions were generated using FreeSurfer, and  
15 both volume- and surface-based versions of the beta weights were created. Estimated beta weights  
16 provided in the subject-native space (func1pt8mm) were used in all of our experiments. Every  
17 stimulus considered in this study had 3 repetitions. We averaged single-trial betas after z-scoring  
18 every voxel within each scan session to create our voxel responses.

19

#### 20 A.2 Response-optimized Model Training Routine

Response-optimized models for each visual area were trained for a maximum of 100 epochs using  
Adam with a learning rate of 1e-4, a batch size of 16 and early stopping (patience = 20) based on the  
Pearson’s correlation coefficient between the predicted and measures responses on the validation set.  
The target signals for each model comprised the image stimuli and voxel-level response vector for  
each ROI. The loss is computed as the following:

$$\mathcal{L} = \sum_{i \in \text{Batch}} \sum_{s=1}^S \sum_{v=1}^{n_s} 1_{i \in I_s} (r_{s,v}^{pred} - r_{s,v}^{meas.})^2,$$

21 where  $1_{i \in I_s}$  is the indicator variable specifying if image  $i$  was shown to subject  $s$ ,  $r_{s,v}^{pred}$  and  $r_{s,v}^{meas.}$   
22 are the predicted and measured response at subject  $s$ , voxel  $v$ . This masked squared error loss  
23 allowed us to backpropagate errors through the shared convolutional backbone even if the subjects  
24 were not exposed to common stimuli. The other response-optimized baseline model (denoted as  
25 ‘Response-optimized (no rotation symmetries)’ in the main text) is optimized following the same  
26 training procedure as defined above.

#### 27 A.3 Details of the task-optimized DNN models evaluated

28 Table A.2 lists all DNN models used as baselines against response-optimized models for quantitative  
29 comparisons. All pre-trained models, except CORnet-S were downloaded from the official PyTorch  
30 Model Zoo. CORnet-S was obtained from the official github repository of the project [3]. For  
31 evaluation of all models except CORnet-S, we downsample convolutional layers by applying an  
32 avgpool layer so that the resulting feature map has dimension at most 9K. We found that further  
33 decreasing it (e.g. to 1K) only decreased the prediction accuracy on the validation set. For CORnet-S,  
34 we do not perform layer selection for each of the 5 visual regions, rather we pre-select the layer  
35 homologous to each visual region, i.e., layers V1, V2 and V4 are used for modeling responses to  
36 voxels in V1, V2 and V4 respectively. We further use the layer IT for modeling responses to LO  
37 and VO. The pre-selection of convolutional layers further allows us to employ a spatial x features  
38 factorized linear readout for the CORnet-S model to enable a fairer comparison with the proposed  
39 response-optimized encoding models. We further resize the convolutional output of the CORnet-S  
40 model to have spatial dimensions of 28x28 (same as the response-optimized model).

41

| <b>Quantitative fit (response predictivity)</b>                                       |                                                            |                                                                            |                                                                                                                                                     |
|---------------------------------------------------------------------------------------|------------------------------------------------------------|----------------------------------------------------------------------------|-----------------------------------------------------------------------------------------------------------------------------------------------------|
| Analysis                                                                              | Probe/evaluation dataset                                   | Metrics for evaluation                                                     | Baselines                                                                                                                                           |
| NSD (i) Generalization to <i>novel stimuli</i> (in-distribution)                      | Held-out stimuli-response pairs from the same NSD subjects | Prediction accuracy (Pearson’s R)                                          | Category ideal observer, ImageNet-trained models (AlexNet, CORnet-S, ResNet-50, DenseNet121) and MS-COCO-trained (ResNet-50) task-optimized models) |
| (ii) Generalization to <i>novel subjects</i>                                          | Held-out stimuli-response pairs from 4 novel NSD subjects  |                                                                            |                                                                                                                                                     |
| (iii) Generalization to <i>OOD stimuli</i>                                            | ‘NSDsynthetic’ stimuli-response pairs                      |                                                                            |                                                                                                                                                     |
| Generalization to novel fMRI datasets                                                 | Algonauts 2019, BOLD5000, Inanimate objects dataset        | RSA (Kendall’s $\tau$ )                                                    | Comparison among response-optimized models                                                                                                          |
| <b>Characterizing neural response properties by probing response-optimized models</b> |                                                            |                                                                            |                                                                                                                                                     |
| Characterizing spatial tuning                                                         | Measured pRF maps from NSD Retinotopy experiment           | Pearson’s R (Eccentricity); Circular correlation coefficient (Polar angle) | —                                                                                                                                                   |
| Characterizing feature representations                                                | NSD-meadows multi-arrangement task                         | RSA (Kendall’s $\tau$ )                                                    | Comparison among response-optimized models                                                                                                          |
| (i) Alignment with human perception                                                   |                                                            |                                                                            |                                                                                                                                                     |
| (ii) Separability of category information                                             | THINGS, ImageNet-16, NSD                                   | RSA (Kendall’s $\tau$ )                                                    |                                                                                                                                                     |
| (iii) Single voxel tuning (maximally activating images)                               | —                                                          | —                                                                          |                                                                                                                                                     |
| (iv) shape v/s texture bias                                                           | ImageNet-16, Silhouette and Geirhos Style Transfer dataset | Transfer performance (classification accuracy), shape bias                 | MS-COCO-trained multi-label object classification network, task-optimized encoding model (AlexNet)                                                  |

Table A.1: Summary of model evaluation and interpretability techniques employed in this study

| Name                                            | Number of parameters | Layers selected for evaluation                                                       |
|-------------------------------------------------|----------------------|--------------------------------------------------------------------------------------|
| <b>AlexNet</b>                                  | 0.61M                | conv1, conv2, conv3, conv4, conv5, fc6, fc7                                          |
| <b>CORnet-S</b>                                 | 53.4M                | V1, V2, V4, IT                                                                       |
| <b>ResNet-50</b>                                | 25.6M                | Last layer of every residual stage (res1, res2, res3, res4) and avgpool              |
| <b>DenseNet-121</b>                             | 8M                   | Last layer of every dense block (denseblock1, denseblock2, denseblock3, denseblock4) |
| <b>ResNet-50 backbone (FasterRCNN, MS-COCO)</b> | 41.7M                | Last layer of every residual stage (res1, res2, res3, res4) and avgpool              |

Table A.2: Details of the task-optimized DNNs used as baselines

#### 42 A.4 Characterizing the spatial tuning of early visual areas: Polar angle agreement

We measured the agreement between the polar angles estimated from the learned encoding model against the polar angle measurements from the independent pRF experiment using the circular correlation coefficient. The circular correlation coefficient between measured and predicted polar angle arrays in an ROI of  $n$  voxels, respectively denoted by  $\{a_m^1, \dots, a_m^n\}$  and  $\{a_p^1, \dots, a_p^n\}$ , called ‘polar angle agreement’, is calculated as,

$$r = \frac{\sum_{i=1}^n \sin(a_m^i - T_m) \sin(a_p^i - T_p)}{\sqrt{\sum_{i=1}^n \sin^2(a_m^i - T_m) \sum_{i=1}^n \sin^2(a_p^i - T_p)}},$$

43 where  $T_m$  and  $T_p$  are the circular mean angles of the measured and predicted polar angle vectors,  
44 respectively,

$$T_m = \left( \frac{1}{n} \sum_{i=1}^n \sin a_m^i, \frac{1}{n} \sum_{i=1}^n \cos a_m^i \right), T_p = \left( \frac{1}{n} \sum_{i=1}^n \sin a_p^i, \frac{1}{n} \sum_{i=1}^n \cos a_p^i \right)$$

#### 45 A.5 Noise ceiling estimation

46 Noise ceiling for every voxel represents the performance of the “true” model underlying the generation  
47 of the responses (the best achievable accuracy) given the noise in the fMRI measurements. They  
48 were computed using the standard procedure followed in [11] by considering the variability in voxel  
49 responses across repeat scans. The dataset contains 3 different responses to each stimulus image  
50 for every voxel. In the estimation framework, the variance of the responses,  $\sigma_{\text{response}}^2$ , are split into  
51 two components, the measurement noise  $\sigma_{\text{noise}}^2$  and the variability between images of the noise free  
52 responses  $\sigma_{\text{signal}}^2$ .

$$\hat{\sigma}_{\text{response}}^2 = \hat{\sigma}_{\text{signal}}^2 + \hat{\sigma}_{\text{noise}}^2$$

53 An estimate of the variability of the noise is given as  $\hat{\sigma}_{\text{noise}}^2 = \frac{1}{n} \sum_{i=1}^n \text{Var}(\beta_i)$ , where  $i$  denotes the  
54 image (among  $n$  images) and  $\text{Var}(\beta_i)$  denotes the variance of the response across repetitions of the  
55 same image. An estimate of the variability of the noise free signal is then given as,

$$\hat{\sigma}_{\text{signal}}^2 = \hat{\sigma}_{\text{response}}^2 - \hat{\sigma}_{\text{noise}}^2$$

56 Since the measured responses were z-scored,  $\hat{\sigma}_{\text{response}}^2 = 1$  and  $\hat{\sigma}_{\text{signal}}^2 = 1 - \hat{\sigma}_{\text{noise}}^2$ . The noise ceiling  
57 (n.c.) expressed in correlation units is thus given as  $n.c. = \sqrt{\frac{\hat{\sigma}_{\text{signal}}^2}{\hat{\sigma}_{\text{signal}}^2 + \hat{\sigma}_{\text{noise}}^2}}$ . The models were evaluated  
58 in terms of their ability to explain the average response across 3 trials (i.e., repetitions) of the stimulus.  
59 To account for this trial averaging, the noise ceiling is expressed as  $n.c. = \sqrt{\frac{\hat{\sigma}_{\text{signal}}^2}{\hat{\sigma}_{\text{signal}}^2 + \hat{\sigma}_{\text{noise}}^2/3}}$ . We  
60 computed noise ceiling using this formulation for every voxel in each subject and expressed the  
61 noise-normalized prediction accuracy (R) as a percentage of this noise ceiling.

#### 62 A.6 Principal components analysis for characterizing features in high-level visual area VO

63 We implemented a principal components analysis on the predicted activity patterns in the anterior  
64 ventral stream ROI VO to all 26,107 images from the THINGS dataset [4]. This also enables us to  
65 find a compressed representation of thousands of voxels in VO (across 4 subjects). We found that the  
66 first 2 principal components explained a large proportion of the variance in voxel responses (main text  
67 Figure 5D). We examined the 2 discovered components by ordering exemplars along each component  
68 dimension for intuitive exposition. Specifically, we extracted the top and bottom 100 images for each  
69 PC dimension. We extracted the top 5 concepts that had the highest frequency in each of the top and  
70 bottom image sets (the THINGS dataset comprises a total of 1,854 diverse concepts) and visualized  
71 the two images within each of these concept categories that elicited the highest/lowest response along  
72 the PCs. These images are shown in the main text Figure 5D [left]. We also plotted all images in the  
73 2-dimensional space spanned by the PCs and colored them based on the animate/inanimate labels  
74 provided along with the THINGS dataset (as part of the Top-Down WordNet Category).

## 75 A.7 Generalization to held-out NSD subjects

76 For each of the 4 held-out NSD subjects, the dataset comprised brain responses to 5,445 stimuli with  
77 3 repetitions (remaining stimuli had either 1 or 2 repetitions and were discarded from analysis). To  
78 assess generalization of response-optimized models in terms of predicting responses on held-out  
79 NSD subjects, we fixed the weights of the shared convolutional backbone and used data from new  
80 NSD participants to train their linear readouts. We varied the size of the training set for learning  
81 readout weights from a mere 100 stimulus-response pairs from every new participant to a large set of  
82 4,500 pairs. The readouts had the same architecture as the original models, i.e., they were factorized  
83 into spatial and feature dimensions. The readouts were trained independently for each subject, each  
84 training set size and each visual ROI for 100 epochs with an early stopping criterion (patience of 20).  
85 For task-optimized and category ideal observer models, we fit linear regression models (as described  
86 above for the original 4 subjects) using these restricted sample sizes. The regularization parameter  
87 for both semantic and task-optimized models was optimized independently for each training set size,  
88 each subject and for voxels in each visual area by testing among 8 log-spaced values in [1e-4, 1e4].

## 89 A.8 Category ideal observer model

90 We fit a category ideal observer model using category annotations for NSD images. The input to  
91 the categorical model is an 80-D binary vector corresponding to the 80 object categories annotated  
92 in the MS-COCO database, where each element indicates whether the corresponding category was  
93 present in the image or absent. The weights corresponding to different categories for every voxel are  
94 optimized by fitting a  $l_2$  regularized linear regression model. The regularization parameter for this  
95 model was optimized independently for each subject and for voxels in each visual area by testing  
96 among 8 log-spaced values in [1e-4, 1e4].

## 97 A.9 Maximally activating images

98 We performed k-means clustering (k=4) on model-predicted voxel-level responses of each visual ROI  
99 to locate ‘representative’ voxels (cluster medians) for visualization, rather than randomly selecting  
100 these voxels. Following [5], we start with a random noise input  $x_0$  for each model neuron  $i$   
101 and iteratively update the input along the gradient  $\frac{\partial a_i}{\partial x}$  to synthesize inputs that would result in  
102 higher and higher predicted activation  $a_i$  for that neuron. For visualization purposes, since we were  
103 interested in *featural* tuning, we discarded the spatial mask in the readout of every voxel and used  
104 the learned feature tuning of every voxel to create an additional 1x1 convolutional layer, so that  
105 every voxel is represented by an independent unit in this convolutional layer and synthesized inputs  
106 to activate individual units in this convolutional *voxel* layer instead. Most visualization techniques  
107 further employ an *image prior* in the form of a regularizer to encourage stable results [6, 7]. This  
108 visualization technique is commonly employed in neural network interpretability research to find the  
109 features that drive model neurons. Formally, the goal of finding the maximally activating image  $x^*$  is  
110 then expressed as the following optimization problem.

$$x^* = \underset{x \in \mathbb{R}^{H \times W \times C}}{\text{argmax}} A_{ij}(\theta, x) + \mathcal{R}(x)$$

111 where  $A_{(i,j)}(\theta, x)$  denotes the activation of unit  $i$  from layer  $j$  in the neural network to input  $x$   
112 (H: Height, W: Width, C: Channels), and  $\theta$  denotes the parameters of the network. The latter are  
113 fixed during the above optimization procedure.  $\mathcal{R}(x)$  denotes the regulariser. In order to generate  
114 maximally activating image for the  $j$ th voxel, we set  $i$  to the output voxel layer and  $j$  to be the index  
115 of the model neuron in the output layer that emulates voxel  $j$ . We find a local solution for the above  
116 optimization problem by performing gradient ascent in the input space and updating  $x$  iteratively in  
117 the direction of the gradient of  $A_{ij}(\theta, x) + \mathcal{R}(x)$ . We employed a very weak form of regularization,  
118 where we stochastically jitter (up to 3 px) the image before each optimization step to avoid high  
119 frequency noise. We also blurred the image after every gradient ascent step using a Gaussian filter  
120 to avoid high-frequency effects. The images are optimized starting from random noise with Adam  
121 optimizer for 1000 steps using a step size of 1.

## 122 A.10 Shape bias analysis

123 **Training baseline object classification model on MS-COCO** We train a baseline DNN for multi-  
124 label object classification on the entire MS-COCO dataset. The dataset comprises 82,081 training and

125 40,137 validation images, with most images containing multiple objects at once. Since NSD images  
 126 were drawn from the MS-COCO dataset, this serves as a useful control for assessing features that  
 127 may arise simply due to the dataset distribution. The model employs the same backbone architecture  
 128 as the proposed rotation-equivariant response-optimized model comprising 4 convolutional blocks  
 129 with E(2)-steerable convolutions. The convolutional output is downsampled to a spatial resolution of  
 130  $4 \times 4$  and is mapped on to an 80-D output using a linear layer. The model is optimized for multi-label  
 131 classification using a Binary Cross-Entropy loss with an Adam optimizer (learning rate of 0.001).  
 132 The model is trained for 30 epochs and achieves a mean Average Precision (mAP) measure of 66.7%  
 133 on the validation set, which is within the range of competitive CNN models, although on the lower  
 134 end of that range [8].

135 **Mapping predicted voxel-wise responses to ImageNet-16 category labels and measuring transfer**  
 136 **performance** We use the proposed response-optimized models to extract the *predicted* responses  
 137 of voxels in every region to stimuli from a small subset of the large-scale ImageNet-16 dataset. This  
 138 subset comprised 500 images from each of the 16 categories, resulting in a total of 8,000 images  
 139 (same samples were used in the RDM analyses shown in the main text Figure 5B). The predicted  
 140 voxel-wise responses for every visual area constitute the *representational space* of that ROI. We  
 141 randomly split the 8,000 images into training (70%), validation (5%) and test sets (25%) and fitted  
 142  $l_2$  regularized linear classification models (known as ridge classifiers) on top of this ROI-specific  
 143 representational space to predict the category label of test images from the ImageNet-16 subset. The  
 144 predicted labels were compared against the ground truth labels to compute the ImageNet-16 transfer  
 145 performance. Error bars are computed over 5 random splits. This approach is akin to supervised  
 146 linear probes [9], where linear classifiers are trained independently of the models to probe their neural  
 147 representations. The classification accuracy provides a quantitative measure of the ability of each  
 148 ROI-specific neural representational space to support object classification. As demonstrated in the  
 149 main text, this classification capacity increases along the ventral visual hierarchy [4].

150 We also used the response-optimized models to extract the model-*predicted* responses of voxels  
 151 in every region to 160 images (10 per category) from the Silhouettes dataset [10]. The predicted  
 152 responses were mapped onto the 16 category labels using the linear classifier weights estimated with  
 153 the ImageNet-16 dataset (as described above) without any additional fitting. This also helps us assess  
 154 how well the prediction function generalizes to out-of-domain stimuli, such as image silhouettes. The  
 155 classification performance on this dataset is termed ‘Silhouettes transfer performance’.

156 **Shape bias evaluation** (a) Response-optimized  
 157 models: Finally, we use the response-optimized models  
 158 to extract the model-*predicted* responses of vox-  
 159 els in every region to 1200 images from the Geirhos  
 160 cue-conflict dataset [10]. We map these predicted  
 161 responses onto the 16-class-ImageNet categories using  
 162 the linear classifier weights estimated with the  
 163 ImageNet-16 subset (as described above). Each im-  
 164 age from this dataset has a texture and a shape label.  
 165 The shape bias of each response-optimized model is  
 166 then computed as the percentage of times it classi-  
 167 fies images from the cue-conflict dataset according  
 168 to shape, provided it classified either shape or texture  
 169 correctly.

170 (b) Task-optimized models: We can also compute  
 171 the shape bias of task-optimized encoding models  
 172 (here, we assess the AlexNet model) by extracting  
 173 their predicted voxel-wise responses to the images  
 174 from the Geirhos cue-conflict dataset and mapping  
 175 these responses to the 16-class-ImageNet categories.  
 176 For the mapping, we follow the same procedure as  
 177 employed in the case of response-optimized models,  
 178 wherein a linear classifier is first trained to map the  
 179 predicted responses to 16 classes using the 8,000  
 180 images from the ImageNet-16 subset. The transfer

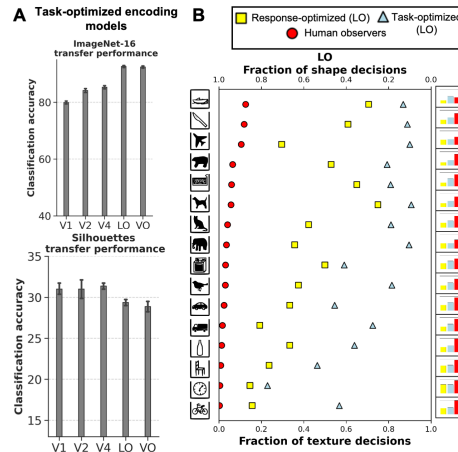

Figure A.1: **A.** Transfer performance of different task-optimized encoding models on ImageNet-16 dataset. **B.** Fraction of shape vs. texture decisions for stimuli with cue conflict. Bar plots on the right display the proportion of correct decisions (either shape or texture recognized correctly) as a fraction of all trials for human observers as well as response-optimized and task-optimized models of LO.

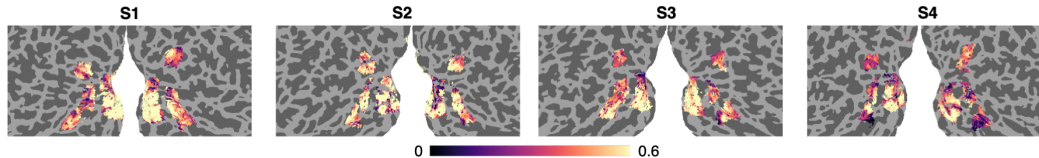

Figure A.2: *Voxel-wise prediction accuracy ( $R$ )* of the proposed response-optimized model across all voxels in all the 5 visual ROIs depicted on cortical flatmaps for each subject. High prediction accuracy ( $> 0.6$ ) is obtained across large swathes of the cortex, well beyond early visual cortex (V1-V4) into LO and VO as well.

181 performance in this case is much higher than the  
 182 transfer performance of response-optimized models,  
 183 as shown in Supplementary Figure [A.1](#). This gap is  
 184 perhaps unsurprising given that the task-optimized  
 185 encoding models inherit feature representations *optimized* for ImageNet classification. The shape  
 186 bias is evaluated using the same approach as response-optimized models. As shown in the main  
 187 text Figure [4B](#) [bottom], these models exhibit a strong texture bias. This is also not surprising given  
 188 that the task-optimized encoding model is more likely to reflect the biases of supervised ImageNet  
 189 training [\[10\]](#).

## 190 B Supplemental Results

### 191 B.1 Voxel-wise prediction accuracy on cortical surface

192 Supplementary Figure [A.2](#) depicts the raw voxel-wise prediction accuracy of the proposed response-  
 193 optimized models on the cortical surface for each of the 4 NSD participants analyzed in the main  
 194 study.

### 195 B.2 Generalization to novel datasets

196 We also compared the representational similarity structure captured by response-optimized models of  
 197 different ROIs to novel stimuli from other well-known fMRI datasets besides NSD. Here, we wanted  
 198 to assess whether the models indeed captured ROI-specific features that could generalize in explaining  
 199 representational geometries of similar visual ROIs in different datasets. While the ROI definitions  
 200 and nomenclature can vary substantially across these datasets because of the different protocols  
 201 involved in their localization, we expected the response-optimized models to capture representational  
 202 geometry of voxel responses in ROIs that lie in a roughly similar anatomical location as any of the  
 203 5 ROIs considered in this study. We first performed this generalization analysis using the classical  
 204 RSA framework (without any fitting) on the following two widely-used fMRI datasets: (1) **Cichy**  
 205 **et al. dataset** [\[11\]](#) comprises fMRI recordings while 15 human participants observed 92 images of  
 206 natural objects (this dataset was also used in the Algonauts 2019 Challenge Training Set): Here, the  
 207 subject-averaged RDMs of early ('EVC') and high-level visual ROIs ('IT') were already computed  
 208 and publicly distributed by the authors. Further details about the localization of these 2 ROIs are  
 209 provided in [\[11\]](#). (2) **BOLD5000 V2 (GLM-denoised) dataset** [\[12\]](#) comprises fMRI recordings  
 210 from 4 subjects (CS11-4), while they each viewed  $\sim 5,254$  natural scene images. Subject CS14 was  
 211 discarded from this analyses since this subject completed much fewer scan sessions. We restrict our  
 212 analyses to the 1,000 images within the BOLD5000 dataset that are shared with the NSD dataset.  
 213 This enables us to compute the match not just against model-predicted RDMs but also against RDMs  
 214 derived from *measured* responses in NSD subjects. Importantly, these 1,000 images are all part of the  
 215 test set and were not used in training any of the response-optimized models. We focus on two visual  
 216 ROIs in this dataset, namely 'EarlyVis' and 'LOC', which had (at least) a partial overlap with some  
 217 of the 5 visual ROIs we modeled in our study.

218 For stimuli from each of the above datasets, we first extracted model-predicted responses from  
 219 the response-optimized models of all 5 visual ROIs: [V1, V2, V4, LO, VO]. We then computed  
 220 model RDMs separately for each ROI by computing the pairwise correlation distance between the  
 221 model-predicted responses of all images in each dataset. We then computed the RDM similarity  
 222 between model-predicted RDMs of each ROI against the observed-response RDMs (computed using

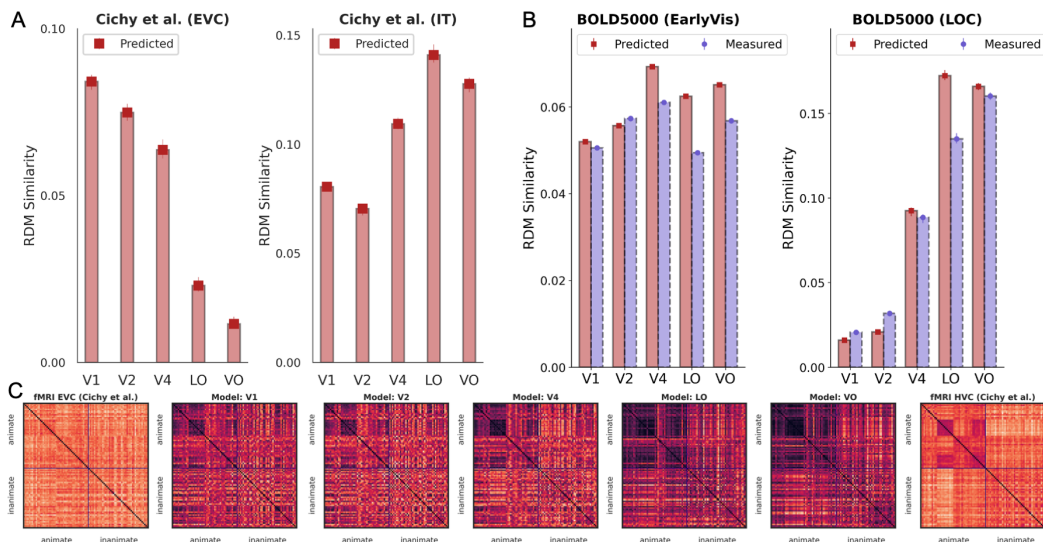

Figure A.3: *Generalization to the Cichy et al. and BOLD5000 datasets* assessed with classical RSA. A and B depict the RDM similarity between model-predicted RDMs (5 models corresponding to the 5 visual ROIs considered in this study) and fMRI RDMs from the Cichy et al. and BOLD5000 datasets, respectively. C depicts the model-predicted RDMs from each ROI model (V1-VO, center) as well as the fMRI RDMs of ‘EVC’ (left) and ‘IT’ ROIs (right)

223 the respective fMRI datasets). RDM similarities were computed using the Kendall’s  $\tau$  coefficient. As  
 224 shown in Supplementary Figure A.3, response-optimized model RDMs captured the representational  
 225 geometry of respective ROIs in these novel fMRI datasets. For e.g., early visual ROI model RDMs  
 226 (V1-V4) better match fMRI RDMs of early visual areas (‘EVC’ in Cichy et al. and ‘EarlyVis’ in  
 227 BOLD5000) and higher-order ROI model RDMs (LO and VO) better match fMRI RDMs of higher-  
 228 order visual areas (‘IT’ in Cichy et al. and ‘LOC’ in BOLD5000). This can also be qualitatively  
 229 in the model-predicted and fMRI RDMs for the Cichy et al. dataset (Supplementary Figure A.3C).  
 230 Importantly, we also had access to the measured responses in NSD participants to the restricted  
 231 BOLD5000 image set since the same stimuli were also shown to NSD participants. This enabled us  
 232 to compare subject-averaged measured RDMs (from observed responses of NSD participants) against  
 233 BOLD5000 observed RDMs. Intriguingly, this agreement against observed BOLD5000 RDMs was  
 234 greater with *predicted* than *measured* NSD responses, likely highlighting the denoising quality of  
 235 encoding models (Figure A.3B). Further, the model-predicted RDM similarity follows the same  
 236 pattern as NSD-measured RDM similarity across ROIs, suggesting that the models indeed capture  
 237 features idiosyncratic to each visual ROI.

238 We also assesses model generalization to a challenging new fMRI dataset, namely the Inanimate  
 239 Objects dataset from Konkle et al. ( [13] ). As shown in [13], current SOTA supervised and  
 240 unsupervised models trained on ImageNet struggle to predict voxel responses to stimuli from this  
 241 dataset. This dataset comprises fMRI responses from 10 participants to 72 everyday objects. We  
 242 focused on responses within two high-level visual ROIs in this dataset, namely posterior occipito-  
 243 temporal cortex (pOTC), and the anterior occipito-temporal cortex. We extracted model-predicted  
 244 responses from the response-optimized models of all 5 visual ROIs: [V1, V2, V4, LO, VO] to each  
 245 of the 72 images in this dataset to construct the model representational space. Model-brain match  
 246 in this dataset was then measured using a voxelwise encoding RSA (veRSA) procedure, following  
 247 the same protocol described in [13] for consistency. Performance of competing models, namely  
 248 (i) a Supervised ImageNet-trained model and (ii) a self-supervised ImageNet-trained model, called  
 249 instance-prototype contrastive learning (IPCL) with an AlexNet architecture was already reported  
 250 in the main paper describing this dataset [13] and is included in Supplementary Figure A.4 for  
 251 comparison. As shown in Supplementary Figure A.4, response-optimized models of high-level  
 252 visual ROIs (and not early visual ROIs) perform on par with these SOTA models in predicting neural  
 253 responses in both the high-level visual ROIs (pOTC and aOTC), serving as another useful model  
 254 class for studying high-level visual cortical representations.

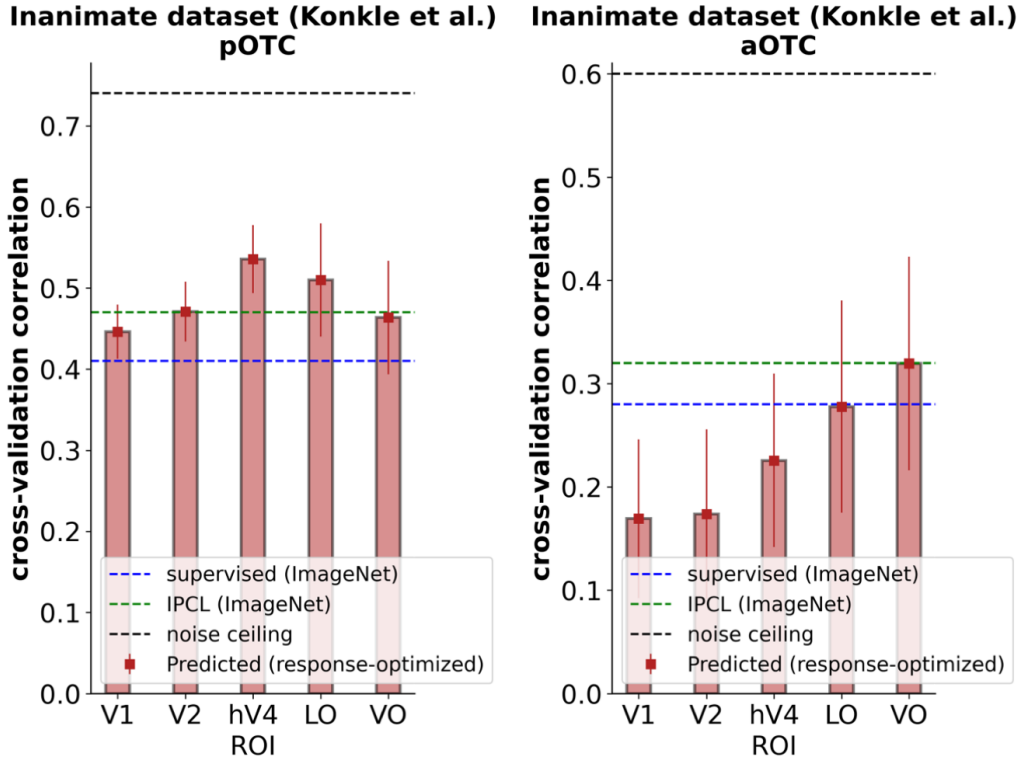

Figure A.4: *Generalization to the Konkle et al. Inanimate Objects dataset* assessed with voxel-wise encoding RSA as described in [13]. Performance numbers for competing models (Supervised (ImageNet), IPCL (ImageNet)) as well as the noise ceiling are taken directly from the values reported in the main paper (details provided in [13].)

### 255 B.3 Models retain signatures of voxel-level idiosyncracies

256 We correlated the predicted response of every voxel (from the proposed response-optimized model)  
 257 against the measured response of every other voxel (across all 4 subjects in the main study) in each  
 258 ROI to obtain a *voxel identifiability matrix* per ROI. Visualizing this matrix helps us assess whether the  
 259 models indeed captured meaningful voxel-level idiosyncracies. We note that all response-optimized  
 260 models retain signatures of individual voxel-level idiosyncracies as indicated by the prominent  
 261 diagonal nature of the *voxel identifiability matrices* (Supplementary Figure A.5); this illustrates that  
 262 the predicted response for a voxel best matches the measured response for the *same* voxel in the *same*  
 263 subject. This enables us to perform population-level analysis with these predictive models.

### 264 B.4 Variability in voxel response predictivity is driven by the noise ceiling

265 We visualized the raw predictive accuracy (R) for every voxel, as achieved using the proposed  
 266 response-optimized model, against that voxel's corresponding noise ceiling to see if there was a  
 267 systematic trend. We observed that a large proportion of the variance in predictive accuracy across  
 268 voxels is driven by their noise ceiling, as shown in Supplementary Figure A.6.

### 269 B.5 Quantifying the complexity of synthesized images

270 We measured the complexity of synthesized images optimized to maximally activate individual  
 271 voxels (as shown in Figure 4A) using a measure based on compression ratios, that was previously  
 272 adopted to quantify complexity of synthesized images [14]. Briefly, this metric, based on the discrete  
 273 cosine transform, estimates the minimum number of coefficients (corresponding to different spatial  
 274 frequencies) needed to accurately reconstruct an image, which in turn indicates the 'compressibility'  
 275 (or inversely, complexity) of the image. We quantified the complexity of all images in Figure 4A as



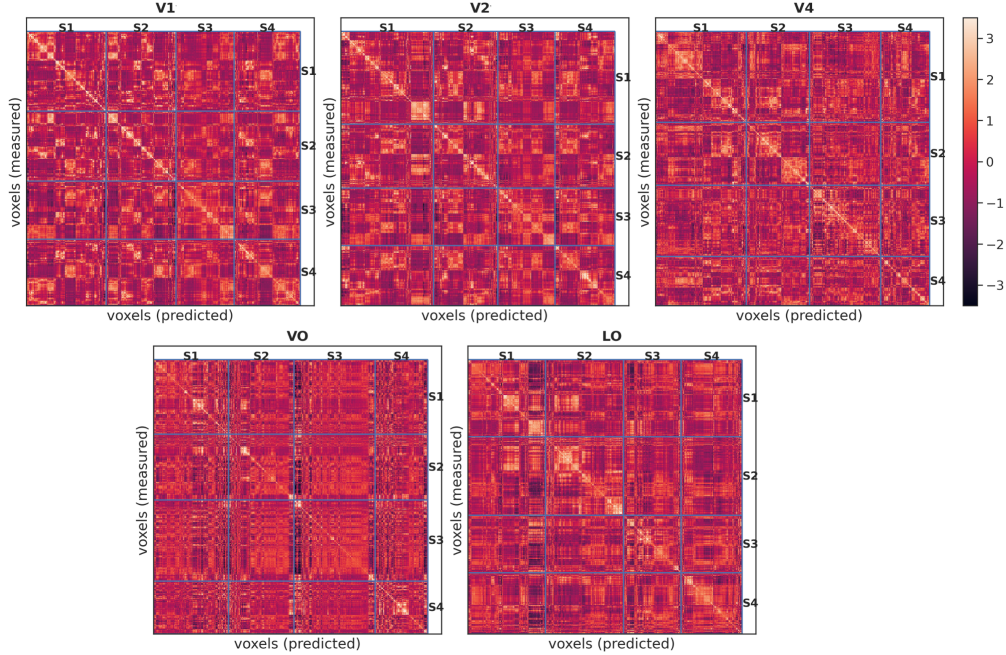

Figure A.5: *Voxel identifiability matrix* for every ROI is computed by correlating the predicted response for every voxel against the measured response of every other voxel in that ROI. To account for higher variability in measured versus predicted responses, we normalize the rows and columns of this correlation matrix.

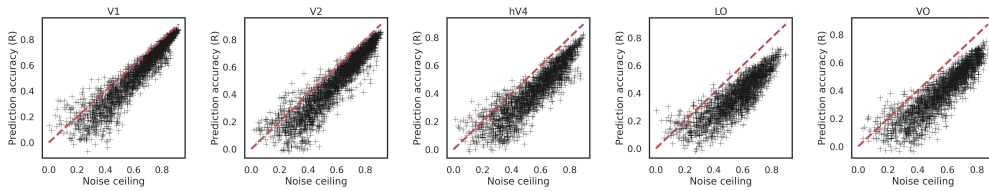

Figure A.6: Each scatter plot depicts the raw prediction accuracy ( $R$ ) for all voxels (obtained using the proposed response-optimized model) belonging to one of the five ROIs against their corresponding noise ceiling.

276 the inverse of their respective compression ratios and found that the complexity does indeed increase  
 277 along the ventral visual hierarchy [A.3](#).

278 We also extracted the top 3 natural images among the THINGS database ( $\sim 27,000$  images) that  
 279 produce the highest predicted response for each V1 or VO voxel (the two ends of the hierarchy) visu-  
 280 alized in Figure [4A](#). The natural images contain similar featural configurations as their corresponding  
 281 synthesized counterparts [A.7](#); the natural images for V1 voxels contain objects at specific orientations  
 282 or high frequency spatial patterns reminiscent of the orientation preferences visible in the synthesizes  
 283 images, whereas the images for VO contain complex shapes like concentric circles, rectangles and  
 284 hexagons, again in agreement with their respective synthesized images.

285

## 286 B.6 Human behavioral data from ‘nsdmeadows’

287 We also employ the T-distributed Stochastic Neighbor Embedding (t-SNE) algorithm to visualize  
 288 human behavioral data from the ‘nsdmeadows’ experiment where NSD participants performed a  
 289 Multiple arrangement Task [\[1\]](#). Supplementary Figure [A.9](#) depicts the t-SNE visualization of the mean  
 290 pairwise dissimilarity matrix across all 8 NSD subjects. The pairwise dissimilarity matrix (RDM) for

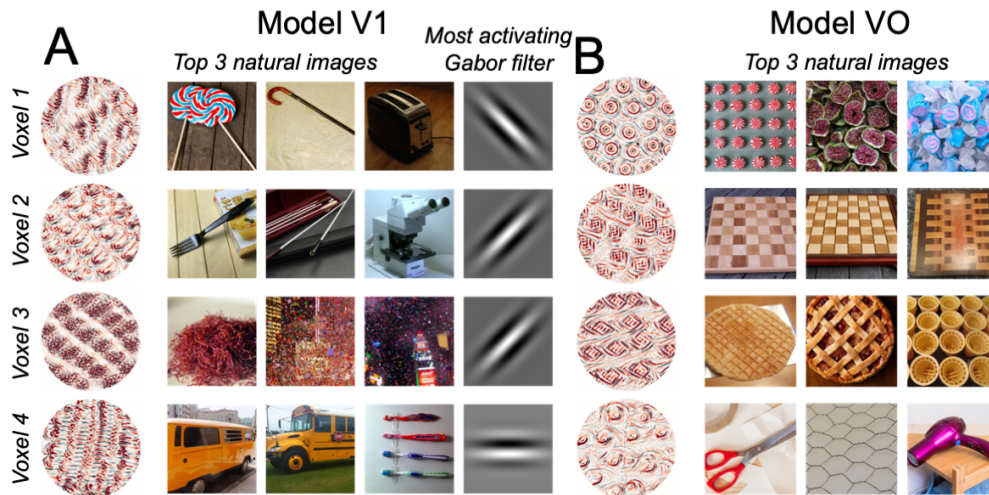

Figure A.7: **A** and **B** show the synthesized and natural images (among the THINGS database) that most highly activate each of the 4 individual voxels visualized in Figure 4A, belonging to V1 and VO, respectively. The natural images are reminiscent of the patterns in their corresponding synthesized counterparts. For V1 voxels, we also visualize the Gabor filter (among a filter bank of 4 sine and cosine gabors) that produces the highest model-predicted response for each voxel.

| Model ROI | Complexity    |
|-----------|---------------|
| V1        | 0.439+/-0.041 |
| V2        | 0.433+/-0.012 |
| V4        | 0.449+/-0.034 |
| LO        | 0.536+/-0.079 |
| VO        | 0.637+/-0.012 |

Table A.3: Complexity of the synthesized images for each visual region.

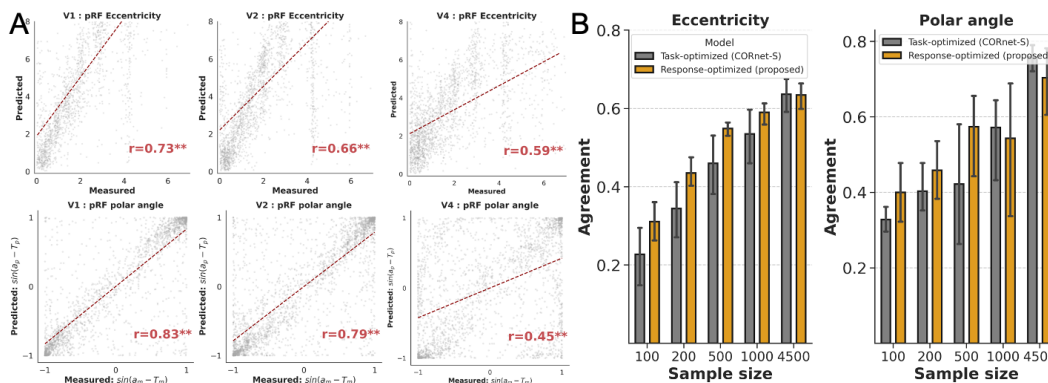

Figure A.8: **pRF estimation with task-optimized CORnet-S encoding models.** **A** Scatter plots showing predicted and localizer-estimated retinotopic parameters for all voxels in all 4 subjects. Inset correlations are computed using voxels from all 4 subjects. **C** Agreement between estimated and measured retinotopic maps as a function of training examples (stimulus-response pairs) from novel subjects used to train their linear readout. Error bars depict the 95% CI around estimated mean.

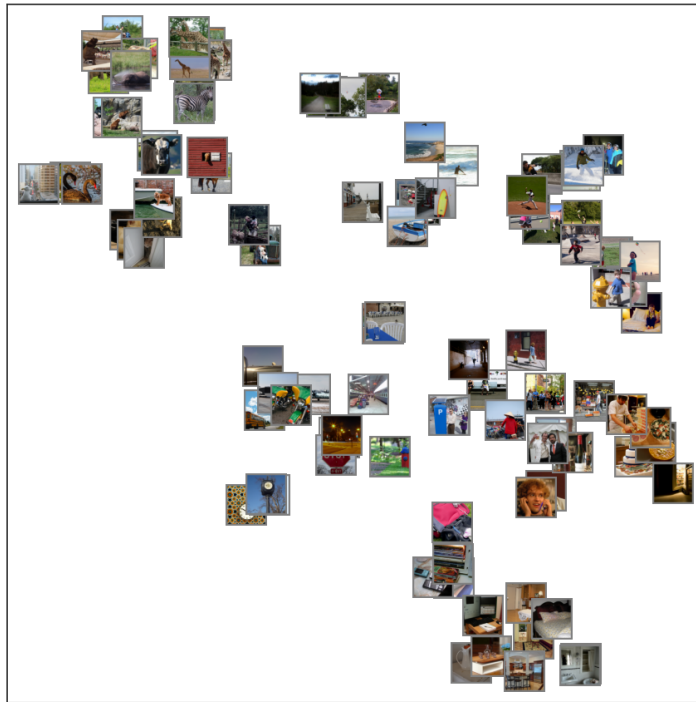

Figure A.9: **Human behavioral data T-SNE** plot depicting human similarity assessments for the 100 images used in the ‘nsdmeadows’ experiment.

291 each participant was released with NSD. We see that even qualitatively, pairwise similarities from  
 292 human behavioral data appear remarkably similar to pairwise similarities estimated from model-  
 293 predicted VO responses (shown in the main text Figure 5A); in both cases, faces and scenes appear  
 294 clustered together. This is in contrast to the pairwise similarities estimated from model-predicted V1  
 295 responses, as shown below in Supplementary Figure A.10

## 296 C Supplemental Discussion

### 297 C.1 Relationship to concurrent work

298 Concurrent with the present work, recent papers [15, 16] have demonstrated that when trained with  
 299 large amounts of data such as NSD, the response-optimization approach can perform competitively  
 300 with state-of-the-art task-optimized models. Khosla et al. [16] adopt similar neural network archi-  
 301 tectures and compare asymptotic performance and sample complexity in models of specialized  
 302 category-selective regions of the brain, such as FFA and EBA, and do not study the ventral visual  
 303 cortical hierarchy (the ROIs investigated in this study). St. Yves et al. [15] study the early to  
 304 intermediate visual cortex (V1-V4), specifically the role played by the brain hierarchy in training  
 305 brain-optimized models that are not hierarchical by design, presenting alternate evidence against  
 306 the hierarchical nature of neural representations. Our work differs from these studies in several  
 307 respects: (i) We develop models for regions along the *entire* ventral visual hierarchy, including  
 308 higher-order ROIs like LO and VO (the human analogues of IT). (ii) We study the generalization  
 309 of response-optimized models to datasets beyond NSD and compare against a richer battery of  
 310 task-optimized models. (iii) We demonstrate the denoising capability of models, showing that the  
 311 predicted activity not only serves as a useful surrogate for the measured activity, but also yields a  
 312 better match to neural data in other datasets and human behavior. (iv) While St. Yves et al. [15] also  
 313 demonstrate the ability of response-optimized models to recover the retinotopic organization in early  
 314 visual cortex, they do so at the qualitative level of capturing size-eccentricity relationships. In the  
 315 present study, we perform rigorous quantitative comparisons and sample complexity analysis on the  
 316 ability of response-optimized models to capture the precise spatial receptive field tuning of individual  
 317 voxels. (v) St. Yves et al. [15] focus on network architectures and ask if hierarchy, at the level of

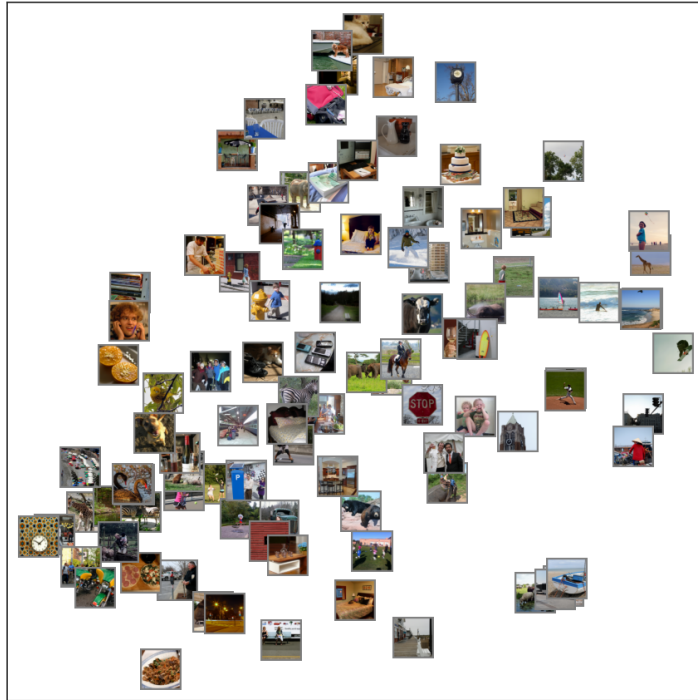

Figure A.10: **V1** T-SNE plot depicting the similarity structure of model-predicted V1 responses for the 100 images used in the ‘nsd-meadows’ experiment.

318 model architecture, is needed to explain brain activity. Here, on the other hand, we ask: what *features*  
 319 emerge spontaneously in networks optimized to explain brain activity and what kinds of biases do  
 320 these networks exhibit (shape v/s texture)? We demonstrate increasing separability of categorical  
 321 information and alignment with human perception in the optimized *models* of ventral visual  
 322 stream regions, providing a model abstraction of this key neural phenomenon. In the future, we  
 323 hope these can be richly interrogated to generate mechanistic hypotheses. The strong shape bias in  
 324 response-optimized, but not task-optimized models, further has interesting implications for computer  
 325 vision models. Altogether, these studies and our work invite a shift from the task-optimized modeling  
 326 framework, providing an alternate modeling strategy to understand neural representations.

## 327 References

- 328 [1] Emily J Allen, Ghislain St-Yves, Yihan Wu, Jesse L Breedlove, Jacob S Prince, Logan T  
329 Dowdle, Matthias Nau, Brad Caron, Franco Pestilli, Ian Charest, et al. A massive 7t fmri dataset  
330 to bridge cognitive neuroscience and artificial intelligence. *Nature neuroscience*, 25(1):116–126,  
331 2022.
- 332 [2] Tsung-Yi Lin, Michael Maire, Serge Belongie, James Hays, Pietro Perona, Deva Ramanan, Piotr  
333 Dollár, and C Lawrence Zitnick. Microsoft coco: Common objects in context. In *European*  
334 *conference on computer vision*, pages 740–755. Springer, 2014.
- 335 [3] Jonas Kubilius, Martin Schrimpf, Aran Nayebi, Daniel Bear, Daniel LK Yamins, and James J  
336 DiCarlo. Cornet: Modeling the neural mechanisms of core object recognition. *BioRxiv*, page  
337 408385, 2018.
- 338 [4] Martin N Hebart, Adam H Dickter, Alexis Kidder, Wan Y Kwok, Anna Corriveau, Caitlin  
339 Van Wicklin, and Chris I Baker. Things: A database of 1,854 object concepts and more than  
340 26,000 naturalistic object images. *PLoS one*, 14(10):e0223792, 2019.
- 341 [5] Dumitru Erhan, Yoshua Bengio, Aaron Courville, and Pascal Vincent. Visualizing higher-layer  
342 features of a deep network. *University of Montreal*, 1341(3):1, 2009.
- 343 [6] Jason Yosinski, Jeff Clune, Anh Nguyen, Thomas Fuchs, and Hod Lipson. Understanding  
344 neural networks through deep visualization. *arXiv preprint arXiv:1506.06579*, 2015.
- 345 [7] Aravindh Mahendran and Andrea Vedaldi. Understanding deep image representations by invert-  
346 ing them. In *Proceedings of the IEEE conference on computer vision and pattern recognition*,  
347 pages 5188–5196, 2015.
- 348 [8] Jiang Wang, Yi Yang, Junhua Mao, Zhiheng Huang, Chang Huang, and Wei Xu. Cnn-rnn: A  
349 unified framework for multi-label image classification. In *Proceedings of the IEEE conference*  
350 *on computer vision and pattern recognition*, pages 2285–2294, 2016.
- 351 [9] Guillaume Alain and Yoshua Bengio. Understanding intermediate layers using linear classifier  
352 probes. *arXiv preprint arXiv:1610.01644*, 2016.
- 353 [10] Robert Geirhos, Patricia Rubisch, Claudio Michaelis, Matthias Bethge, Felix A Wichmann,  
354 and Wieland Brendel. Imagenet-trained cnns are biased towards texture; increasing shape bias  
355 improves accuracy and robustness. *arXiv preprint arXiv:1811.12231*, 2018.
- 356 [11] Radoslaw Martin Cichy, Gemma Roig, and Aude Oliva. The algonauts project. *Nature Machine*  
357 *Intelligence*, 1(12):613–613, 2019.
- 358 [12] Nadine Chang, John A Pyles, Austin Marcus, Abhinav Gupta, Michael J Tarr, and Elissa M  
359 Aminoff. Bold5000, a public fmri dataset while viewing 5000 visual images. *Scientific data*,  
360 6(1):1–18, 2019.
- 361 [13] Talia Konkle and George A Alvarez. A self-supervised domain-general learning framework for  
362 human ventral stream representation. *Nature Communications*, 13(1):1–12, 2022.
- 363 [14] Olivia Rose, James Johnson, Binxu Wang, and Carlos R Ponce. Visual prototypes in the ventral  
364 stream are attuned to complexity and gaze behavior. *Nature communications*, 12(1):1–16, 2021.
- 365 [15] Ghislain St-Yves, Emily J Allen, Yihan Wu, Kendrick Kay, and Thomas Naselaris. Brain-  
366 optimized neural networks learn non-hierarchical models of representation in human visual  
367 cortex. *bioRxiv*, 2022.
- 368 [16] Meenakshi Khosla and Leila Wehbe. High-level visual areas act like domain-general filters  
369 with strong selectivity and functional specialization. *bioRxiv*, 2022.
